# Supplementary material for: Using machine learning to identify Parkinson’s disease severity subtypes with multimodal data
Source: Research Square preprint supplement (doi:10.21203/rs.3.rs-5523724/v1), 2025-04-21
Supplement: Supplementary file 1 [file 24491788666cf517672717d4.docx]

## **Table 1. Data acquisition and description.**

| **Description** | **Feature** | **Domain** |
| --- | --- | --- |
| Motor symptom severity into five stages | H&Y stage | Clinical data |
| Severity scales of motor and non-motor PD symptoms | MDS-UPDRS Total |
| Non-motor experiences of daily living | MDS-UPDRS Part I |
| Motor experiences of daily living | MDS-UPDRS Part II |
| Motor disorder severity | MDS-UPDRS Part III |
| Global cognitive function | MMSE |
| Global cognitive function | MoCA |
| Hand grip strength using a dynamometer (Left and right) | Grip strength | Physical function and lifestyle data |
| Time to complete five sit-to-stand movements | 5STST |
| Distance walked in 6 min | 6MWT |
| Balance, gait, and sit-to-stand performance | SPPB |
| Balance performance test | Mini-BEST |
| Nutrition quotient assessing dietary quality | NQ |
| Health-related quality of life (Total, physical, and mental) | SF-36 |
| Physical activity level assessment | IPAQ |
| Average speed during gait | Walking speed | GP_Motion |
| Distance between successive steps of the same foot | Stride length |
| Percentage of gait cycle with both feet on the ground | Double support phase |
| Temporal difference between the peak movements of the lateral humeral epicondyle and lateral femoral epicondyle markers on opposite limbs | Contralateral temporal coordination |
| Maximum rate of change in acceleration | Maximum jerk (m/s³) | GP_Sensors |
| Maximum rate of change in angular velocity | Maximum angular jerk (rad/s³) |
| Average magnitude of acceleration during gait | Mean acceleration (m/s²) |
| Maximum magnitude of acceleration during gait | Maximum acceleration (m/s²) |
| Average magnitude of angular velocity during gait | Mean gyroscope (rad/s) |
| Maximum magnitude of angular velocity during gait | Maximum gyroscope (rad/s) |
| Root mean square of angular velocity | Root mean square gyroscope (rad/s) |
| Root mean square of acceleration | Root mean square acceleration (m/s²) |
| Complexity measure of acceleration pattern | Sample entropy acceleration |
| Complexity measure of angular velocity pattern | Sample entropy gyroscope |

## **Table 2. Descriptive statistics of multimodal data used in the identification of PD severity subtypes.**

| **Domain** | **Feature** | **Individuals according to PD severity subtype** | | | ***p*-value** | | |
| --- | --- | --- | --- | --- | --- | --- | --- |
| **Mild**  **(n = 24; 23.5%)** | **Moderate**  **(n = 47; 46.1%)** | **Severe**  **(n = 31; 30.4%)** | **1 vs. 2** | **2 vs. 3** | **1 vs. 3** |
| **Mean ± standard deviation** | | |
| Demographics data | Age | 64.83±7.25 | 68.00±5.98 | 70.65±8.01 | 0.054a | 0.099a | **0.007**a |
| Height | 164.07±7.82 | 159.90±6.10 | 158.20±10.91 | **0.016**a | 0.381a | **0.030**a |
| Body weight | 64.81±11.87 | 61.98±9.62 | 62.81±11.26 | 0.282a | 0.729a | 0.525a |
| BMI | 23.89±2.76 | 24.17±2.90 | 25.07±3.50 | 0.720b | 0.327b | 0.270b |
| Physical function and lifestyle data | Grip strength_L | 29.60±7.44 | 23.83±7.68 | 22.07±7.08 | **0.003**b | 0.305b | **0.001**b |
| Grip strength_R | 31.30±8.35 | 24.62±6.81 | 23.60±6.97 | **0.001**a | 0.521a | **< 0.001**a |
| 5STST | 7.18±2.28 | 9.06±2.54 | 11.62±5.86 | **0.003**b | 0.062b | **< 0.001**b |
| 6MWT | 433.92±94.71 | 396.30±97.46 | 345.03±94.98 | 0.106b | **0.017**b | **0.001**b |
| SPPB | 11.46±1.44 | 11.04±1.65 | 10.23±2.14 | 0.139b | **0.036**b | **0.003**b |
| Mini-BEST | 24.17±4.55 | 23.70±2.69 | 21.06±2.84 | 0.084b | **< 0.001**b | **< 0.001**b |
| NQ | 66.38±10.03 | 66.15±15.03 | 63.46±11.18 | 0.948a | 0.397a | 0.322a |
| SF-36 (physical) | 63.17±24.97 | 58.53±19.08 | 52.91±18.40 | 0.387a | 0.200a | 0.085a |
| SF-36 (mental) | 64.51±18.98 | 66.16±15.30 | 64.04±18.21 | 0.841b | 0.672b | 0.806b |
| SF-36 (total) | 64.29±21.51 | 59.04±18.65 | 50.90±20.09 | 0.168b | 0.058b | **0.011**b |
| IPAQ | 3301.33±4767.44 | 3391.64±5472.32 | 1162.95±847.62 | 0.913b | **< 0.001**b | **0.002**b |
| Gait parameters in motion analysis systems | Turning_PC1 | 0.44±1.04 | 0.05±0.89 | -0.42±1.00 | 0.076a | 0.180a | **0.012**a |
| Turning_PC2 | -0.50±1.04 | 0.08±0.95 | 0.27±0.93 | **0.001**a | **0.042**a | 0.154a |
| Forward walking_PC3 | 0.29±0.97 | 0.10±0.84 | -0.38±1.15 | 0.150a | 0.916a | 0.141a |
| Backward walking_PC4 | 0.57±1.04 | 0.01±0.84 | -0.45±0.94 | 0.640a | 0.384a | 0.183a |
| Turning_PC5 | 0.25±1.35 | 0.07±0.74 | -0.31±0.98 | 0.250a | 0.756a | 0.344a |
| Turning_PC6 | 0.30±0.98 | -0.24±0.87 | 0.14±1.13 | 0.780a | **0.007**a | **0.029**a |
| Backward walking_PC7 | 0.33±1.19 | -0.07±1.06 | -0.15±0.67 | 0.923a | 0.188a | 0.361a |
| Turning_PC8 | -0.08±1.07 | -0.16±1.04 | 0.31±0.84 | 0.632a | 0.074a | **0.020**a |
| Gait parameters in wearable sensors | LELB_PC1 | 0.13±1.03 | 0.26±1.04 | -0.50±0.71 | 0.595a | 0.295a | 0.670a |
| LELB_PC2 | 0.73±0.84 | 0.06±0.95 | -0.66±0.75 | 0.469a | 0.096a | 0.381a |
| LELB_PC3 | 0.51±1.35 | 0.01±0.92 | -0.41±0.53 | 0.485b | 0.870b | 0.391b |
| LELB_PC4 | 0.71±1.41 | -0.10±0.82 | -0.40±0.47 | 0.349b | 0.438b | 0.051b |
| LELB_PC5 | -0.07±0.57 | -0.06±0.88 | 0.14±1.38 | 0.706b | 0.550b | 0.508b |
| LELB_PC6 | 0.41±0.83 | -0.05±0.88 | -0.24±1.20 | **0.034**b | 0.988b | 0.088b |
| LELB_PC7 | 0.19±1.63 | -0.16±0.55 | 0.10±0.89 | 0.990b | 0.939b | 0.852b |
| LELB_PC8 | 0.01±1.28 | 0.04±1.03 | -0.07±0.69 | **0.015**b | **0.010**b | 0.825b |
| RELB_PC1 | 0.66±1.21 | 0.21±0.68 | -0.83±0.65 | 0.662a | 0.201a | 0.100a |
| RELB_PC2 | 0.63±1.27 | 0.00±0.88 | -0.48±0.62 | 0.222b | 0.146b | **0.021**b |
| RELB_PC3 | 0.63±1.13 | -0.03±0.83 | -0.45±0.90 | 0.971b | 0.246b | 0.289b |
| RELB_PC4 | 0.03±0.85 | -0.05±1.03 | 0.05±1.08 | 0.610b | 0.277b | 0.503b |
| LANK_PC1 | 1.11±0.71 | 0.09±0.55 | -1.00±0.70 | 0.596a | **0.031**a | **0.020**a |
| LANK_PC2 | 0.23±1.31 | -0.24±0.75 | 0.19±1.02 | 0.429b | 0.635b | 0.259b |
| LANK_PC3 | 0.48±1.25 | -0.21±0.86 | -0.05±0.88 | 0.804a | 0.098a | 0.106a |
| LANK_PC4 | 0.50±1.19 | 0.32±1.08 | -0.21±0.84 | 0.653a | 0.248a | 0.582a |
| LANK_PC5 | -0.19±1.09 | 0.32±1.08 | -0.34±0.61 | 0.105a | 0.086a | 0.987a |
| LANK_PC6 | -0.20±1.45 | 0.15±0.82 | -0.07±0.80 | 0.531a | 0.747a | 0.642a |
| RANK_PC1 | 0.95±0.74 | 0.16±0.71 | -0.99±0.63 | 0.810a | **0.032**a | **0.036**a |
| RANK_PC2 | -0.32±0.74 | 0.10±1.20 | 0.09±0.80 | 0.198b | 0.923b | 0.175b |
| RANK_PC3 | 0.44±0.96 | -0.21±0.90 | -0.01±1.09 | 0.876a | 0.123a | 0.163a |
| RANK_PC4 | 0.32±1.02 | 0.06±1.08 | -0.33±0.77 | 0.401a | 0.691a | 0.340a |
| RANK_PC5 | 0.26±1.21 | 0.12±0.86 | -0.37±0.94 | 0.296b | 0.744a | 0.164a |
| PSIS_PC1 | 0.84±0.92 | 0.21±0.66 | -0.98±0.66 | 0.146a | 0.869a | 0.150a |
| PSIS_PC2 | 0.67±1.13 | -0.09±0.90 | -0.38±0.78 | 0.942a | 0.236a | 0.285a |
| PSIS_PC3 | 0.02±0.81 | -0.09±0.42 | 0.11±1.60 | **0.001**b | **0.007**b | 0.476b |
| PSIS_PC4 | 0.59±1.68 | -0.09±0.61 | -0.32±0.49 | **0.030**b | 0.275b | **0.001**b |
|  | PSIS_PC5 | 0.44±1.00 | -0.22±0.88 | 0.00±1.09 | 0.851b | 0.150b | 0.297b |
|  | PSIS_PC6 | 0.30±1.10 | 0.02±0.74 | -0.27±1.20 | 0.907a | 0.143a | 0.080a |
|  | T10_PC1 | 0.30±1.27 | 0.03±0.96 | -0.28±0.75 | 0.808b | 0.104b | 0.206b |
|  | T10_PC2 | 0.69±0.83 | 0.32±0.67 | -1.03±0.71 | 0.458a | 0.821a | 0.454a |
|  | T10_PC3 | 0.64±0.79 | -0.23±0.94 | -0.16±1.04 | 0.496b | **0.007**b | **0.024**b |
|  | T10_PC4 | 0.27±1.22 | 0.01±1.07 | -0.23±0.62 | 0.282b | 0.838b | 0.231b |
|  | T10_PC5 | 0.18±1.22 | 0.05±0.98 | -0.21±0.81 | 0.998a | 0.097a | 0.089a |
|  | T10_PC6 | 0.52±1.32 | -0.08±0.92 | -0.29±0.65 | 0.328b | 0.850b | 0.188b |
| The data are presented as mean ± standard deviation, with significant differences between groups indicated in bold (*p* < 0.05). 1, 2, and 3 indicate mild, moderate, and severe subtypes, respectively.  PD, Parkinson’s disease; BMI, Body mass index; L, Left; R, Right; 5STST, Five times sit-to-stand test; 6MWT, 6 min walking test; SPPB, Short physical performance battery; Mini-BEST, Mini-balance evaluation systems test; NQ, Nutrition quotient; SF-36, 36-item short form health survey; IPAQ, International physical activity questionnaire; PC, Principal components; LELB, Left lateral humeral epicondyle; RELB, Right lateral humeral epicondyle; LANK, Left lateral malleolus; RANK, Right lateral malleolus; PSIS, Posterior superior iliac spine; T10, 10th thoracic vertebra.  a Independent samples *t*-test result  b Mann–Whitney *U* test result | | | | | | | |
