# Supplementary material for: Using machine learning to identify Parkinson’s disease severity subtypes with multimodal data
Source: Research Square preprint supplement (doi:10.21203/rs.3.rs-5523724/v1), 2025-04-21
Supplement: Supplementary file 2 [file e55d5a5d95af41c7c3892905.docx]

## **Mutual Information (MI) algorithm**

The Mutual Information (MI) algorithm is employed to quantify the dependency or shared information between each feature and a target measure, such as MDS-UPDRS Parts (Total, I, II, and III scores). MI evaluates the amount of information obtained about the target measure by knowing the value of a specific feature, which helps in identifying the most relevant features contributing to disease severity. Unlike linear correlation measures such as Pearson’s correlation coefficient, MI captures non-linear relationships between features and the target measure. This makes it useful when dealing with complex multimodal datasets, where linear dependencies might not fully represent the relationship between the features and the disease outcomes.

To ensure robustness and generalizability, we randomly selected 80% of the dataset for feature selection and training purposes. To minimize the impact of random partitioning and avoid overfitting, we performed a 100-fold cross-validation process. In each fold, the dataset was split into an 80% training set and a 20% test set, with random seeding applied for consistency across iterations. This method allowed us to overcome the potential variability of random data splits and provided a reliable list of features best descriptive of MDS-UPDRS Parts (Total, I, II, and III scores).

For each of the 100 folds, we computed the MI score for each feature relative to the MDS-UPDRS target measure. Features were ranked based on their MI scores in each fold. A final feature score was determined by multiplying the number of times each feature appeared in the top selected features across the 100 folds by its average MI score. This process ensured that the final selected features were both frequently selected across multiple iterations and had a consistently high MI score, indicating their importance in predicting MDS-UPDRS scores.

Where *N times* refers to the number of times a feature was selected in the top-ranked features, and *Avg MI Score* refers to the average MI score across the 100 folds.

The following tables display the top features selected for each MDS-UPDRS Parts (Total, I, II, and III scores) based on their MI scores, as determined by the described feature selection method.

### Table 1. – Top features selected by the mutual Information algorithm for the relationship between all modalities and MDS-UPDRS Total.

| **Feature** | **Domain** | **Description** | **Feature selection score** |
| --- | --- | --- | --- |
| RELB_PC1 | GP_Sensors | RMS, mean, and max acceleration and gyroscope, and angular velocity jerk during 360° turning | 0.21 |
| IPAQ | PFL scores | Physical activity level assessment | 0.19 |
| 6MWT | PFL scores | Distance walked in 6 min | 0.18 |
| Turning_PC6 | GP_Motion | Contralateral temporal coordination | 0.16 |
| SF-36 (physical) | PFL scores | Health-related quality of life (Physical) | 0.16 |
| T10_PC2 | GP_Sensors | RMS, mean, and max gyroscope during forward walking and 360° turning | 0.15 |
| SF-36 (total) | PFL scores | Health-related quality of life (Total) | 0.14 |
| PSIS_PC6 | GP_Sensors | RMS, mean, max, and sample entropy gyroscope during forward walking | 0.14 |
| PSIS_PC5 | GP_Sensors | Sample entropy gyroscope during forward walking and 360° turning | 0.11 |
| Mini-BEST | PFL scores | Balance performance test | 0.11 |
| NQ | PFL scores | Nutrition quotient assessing dietary quality | 0.10 |
| Forward walking_PC3 | GP_Motion | Walking speed, stride length, and double support phase | 0.10 |
| LELB_PC6 | GP_Sensors | Sample entropy acceleration during forward walking and 360° turning | 0.10 |
| Backward walking_PC7 | GP_Motion | Double support phase | 0.10 |
| Turning_PC1 | GP_Motion | Walking speed and stride length | 0.09 |
| 5STST | PFL scores | Time to complete five sit-to-stand movements | 0.08 |
| Grip strength_R | PFL scores | Hand grip strength using a dynamometer (Right) | 0.06 |
| Body weight | Demographics | Body weight | 0.06 |
| SPPB | PFL scores | Balance, gait, and sit-to-stand performance | 0.05 |
| PSIS_PC1 | GP_Sensors | RMS, mean, and max acceleration and gyroscope during 360° turning | 0.05 |
| T10_PC4 | GP_Sensors | RMS, mean, and max acceleration, gyroscope, and angular velocity jerk during backward walking | 0.05 |
| LANK_PC4 | GP_Sensors | Max and sample entropy acceleration and jerk during forward walking and 360° turning | 0.04 |
| LELB_PC3 | GP_Sensors | RMS, mean, and max acceleration, gyroscope, and angular velocity jerk during forward and backward walking | 0.04 |
| Age | Demographics | Age | 0.04 |
| RANK_PC3 | GP_Sensors | Max and sample entropy acceleration and jerk during forward walking and 360° turning | 0.03 |
| Turning_PC5 | GP_Motion | Contralateral temporal coordination | 0.03 |
| LANK_PC2 | GP_Sensors | RMS and mean acceleration and gyroscope during forward and backward walking, and 360° turning | 0.03 |
| Height | Demographics | Height | 0.03 |
| LELB_PC1 | GP_Sensors | RMS, mean, and max gyroscope and angular velocity jerk during forward walking and 360° turning | 0.02 |
| RELB_PC4 | GP_Sensors | Sample entropy acceleration and gyroscope during forward and backward walking, and 360° turning | 0.02 |
| LANK_PC3 | GP_Sensors | Max gyroscope, jerk, and angular velocity jerk during forward and backward walking, and 360° turning | 0.02 |
| SF-36 (mental) | PFL scores | Health-related quality of life (Mental) | 0.02 |
| T10_PC5 | GP_Sensors | Sample entropy gyroscope during forward walking and 360° turning | 0.02 |
| LELB_PC4 | GP_Sensors | RMS and mean acceleration during 360° turning | 0.01 |
| T10_PC3 | GP_Sensors | RMS and mean acceleration during forward and backward walking, and 360° turning | 0.00 |

### Table 2. – Top features selected by the mutual Information algorithm for the relationship between all modalities and MDS-UPDRS Part I.

| **Feature** | **Domain** | **Description** | **Feature selection score** |
| --- | --- | --- | --- |
| Grip strength_R | PFL scores | Hand grip strength using a dynamometer (Right) | 0.18 |
| LELB_PC6 | GP_Sensors | Sample entropy acceleration during forward walking and 360° turning | 0.15 |
| RELB_PC3 | GP_Sensors | Max and sample entropy acceleration and jerk during forward and backward walking, and 360° turning | 0.13 |
| Age | Demographics | Age | 0.11 |
| SF-36 (total) | PFL scores | Health-related quality of life (Total) | 0.09 |
| SF-36 (mental) | PFL scores | Health-related quality of life (Mental) | 0.09 |
| PSIS_PC1 | GP_Sensors | RMS, mean, and max acceleration and gyroscope during 360° turning | 0.08 |
| RANK_PC3 | GP_Sensors | Max and sample entropy acceleration and jerk during forward walking and 360° turning | 0.08 |
| 5STST | PFL scores | Time to complete five sit-to-stand movements | 0.08 |
| SPPB | PFL scores | Balance, gait, and sit-to-stand performance | 0.07 |
| T10_PC1 | GP_Sensors | Max and sample entropy acceleration, gyroscope, jerk, and angular velocity jerk during forward walking and 360° turning | 0.06 |
| T10_PC6 | GP_Sensors | Sample entropy acceleration during forward and backward walking | 0.06 |
| Forward walking_PC3 | GP_Motion | Walking speed, stride length, and double support phase | 0.06 |
| Backward walking_PC4 | GP_Motion | Walking speed and stride length | 0.06 |
| Turning_PC2 | GP_Motion | Double support phase | 0.06 |
| SF-36 (physical) | PFL scores | Health-related quality of life (Physical) | 0.05 |
| T10_PC2 | GP_Sensors | RMS, mean, and max gyroscope during forward walking and 360° turning | 0.03 |
| LELB_PC8 | GP_Sensors | Sample entropy acceleration and gyroscope during backward walking | 0.03 |
| Height | Demographics | Height | 0.03 |
| LELB_PC1 | GP_Sensors | RMS, mean, and max gyroscope and angular velocity jerk during forward walking and 360° turning | 0.03 |
| LELB_PC2 | GP_Sensors | Max acceleration, jerk, and angular velocity jerk during forward walking and 360° turning | 0.03 |
| Grip strength_L | PFL scores | Hand grip strength using a dynamometer (Left) | 0.03 |
| PSIS_PC4 | GP_Sensors | RMS, mean, and max acceleration, gyroscope, jerk, and angular velocity jerk during backward walking | 0.03 |
| LANK_PC5 | GP_Sensors | Sample entropy gyroscope during forward and backward walking | 0.02 |
| Turning_PC8 | GP_Motion | Contralateral temporal coordination | 0.01 |
| Turning_PC6 | GP_Motion | Contralateral temporal coordination | 0.01 |
| LELB_PC3 | GP_Sensors | RMS, mean, and max acceleration, gyroscope, and angular velocity jerk during forward and backward walking | 0.01 |
| BMI | Demographics | Body mass index | 0.01 |
| LELB_PC4 | GP_Sensors | RMS and mean acceleration during 360° turning | 0.00 |

### Table 3. – Top features selected by the mutual Information algorithm for the relationship between all modalities and MDS-UPDRS Part II.

| **Feature** | **Domain** | **Description** | **Feature selection score** |
| --- | --- | --- | --- |
| SF-36 (total) | PFL scores | Health-related quality of life (Total) | 0.18 |
| T10_PC2 | GP_Sensors | RMS, mean, and max gyroscope during forward walking and 360° turning | 0.15 |
| RANK_PC1 | GP_Sensors | RMS and mean acceleration and gyroscope during forward and backward walking | 0.14 |
| LANK_PC1 | GP_Sensors | RMS and mean acceleration and gyroscope during forward walking and 360° turning | 0.13 |
| LELB_PC1 | GP_Sensors | RMS, mean, and max gyroscope and angular velocity jerk during forward walking and 360° turning | 0.12 |
| Backward walking_PC4 | GP_Motion | Walking speed and stride length | 0.11 |
| Grip strength_R | PFL scores | Hand grip strength using a dynamometer (Right) | 0.11 |
| RELB_PC1 | GP_Sensors | RMS, mean, and max acceleration and gyroscope, and angular velocity jerk during 360° turning | 0.07 |
| SF-36 (physical) | PFL scores | Health-related quality of life (Physical) | 0.07 |
| 5STST | PFL scores | Time to complete five sit-to-stand movements | 0.07 |
| T10_PC3 | GP_Sensors | RMS and mean acceleration during forward and backward walking, and 360° turning | 0.07 |
| SPPB | PFL scores | Balance, gait, and sit-to-stand performance | 0.07 |
| Grip strength_L | PFL scores | Hand grip strength using a dynamometer (Left) | 0.06 |
| PSIS_PC5 | GP_Sensors | Sample entropy gyroscope during forward walking and 360° turning | 0.06 |
| LELB_PC2 | GP_Sensors | Max acceleration, jerk, and angular velocity jerk during forward walking and 360° turning | 0.06 |
| PSIS_PC6 | GP_Sensors | RMS, mean, max, and sample entropy gyroscope during forward walking | 0.06 |
| LELB_PC6 | GP_Sensors | Sample entropy acceleration during forward walking and 360° turning | 0.05 |
| PSIS_PC2 | GP_Sensors | Max and sample entropy acceleration and jerk during forward walking and 360° turning | 0.05 |
| Age | Demographics | Age | 0.05 |
| PSIS_PC1 | GP_Sensors | RMS, mean, and max acceleration and gyroscope during 360° turning | 0.03 |
| Turning_PC2 | GP_Motion | Double support phase | 0.03 |
| Mini-BEST | PFL scores | Balance performance test | 0.03 |
| Forward walking_PC3 | GP_Motion | Walking speed, stride length, and double support phase | 0.02 |
| 6MWT | PFL scores | Distance walked in 6 min | 0.02 |
| Turning_PC1 | GP_Motion | Walking speed and stride length | 0.02 |
| BMI | Demographics | Body mass index | 0.02 |
| RELB_PC4 | GP_Sensors | Sample entropy acceleration and gyroscope during forward and backward walking, and 360° turning | 0.02 |
| LANK_PC6 | GP_Sensors | Max and sample entropy acceleration and jerk during backward walking | 0.02 |
| LANK_PC3 | GP_Sensors | Max gyroscope, jerk, and angular velocity jerk during forward and backward walking, and 360° turning | 0.02 |
| T10_PC4 | GP_Sensors | RMS, mean, and max acceleration, gyroscope, and angular velocity jerk during backward walking | 0.02 |
| LANK_PC4 | GP_Sensors | Max and sample entropy acceleration and jerk during forward walking and 360° turning | 0.02 |
| LELB_PC7 | GP_Sensors | Sample entropy acceleration during 360° turning | 0.01 |
| NQ | PFL scores | Nutrition quotient assessing dietary quality | 0.01 |
| T10_PC6 | GP_Sensors | Sample entropy acceleration during forward and backward walking | 0.00 |
| T10_PC5 | GP_Sensors | Sample entropy gyroscope during forward walking and 360° turning | 0.00 |
| LELB_PC3 | GP_Sensors | RMS, mean, and max acceleration, gyroscope, and angular velocity jerk during forward and backward walking | 0.00 |
| Body weight | Demographics | Body weight | 0.00 |

### Table 4. – Top features selected by the mutual Information algorithm for the relationship between all modalities and MDS-UPDRS Part III.

| **Feature** | **Domain** | **Description** | **Feature selection score** |
| --- | --- | --- | --- |
| SPPB | PFL scores | Balance, gait, and sit-to-stand performance | 0.22 |
| Grip strength_R | PFL scores | Hand grip strength using a dynamometer (Right) | 0.14 |
| 6MWT | PFL scores | Distance walked in 6 min | 0.14 |
| Backward walking_PC7 | GP_Motion | Double support phase | 0.12 |
| Body weight | Demographics | Body weight | 0.12 |
| Grip strength_L | PFL scores | Hand grip strength using a dynamometer (Left) | 0.12 |
| SF-36 (mental) | PFL scores | Health-related quality of life (Mental) | 0.10 |
| RANK_PC5 | GP_Sensors | Max acceleration and jerk during backward walking | 0.10 |
| BMI | Demographics | Body mass index | 0.09 |
| Height | Demographics | Height | 0.09 |
| T10_PC5 | GP_Sensors | Sample entropy gyroscope during forward walking and 360° turning | 0.09 |
| PSIS_PC5 | GP_Sensors | Sample entropy gyroscope during forward walking and 360° turning | 0.08 |
| T10_PC1 | GP_Sensors | Max and sample entropy acceleration, gyroscope, jerk, and angular velocity jerk during forward walking and 360° turning | 0.08 |
| T10_PC2 | GP_Sensors | RMS, mean, and max gyroscope during forward walking and 360° turning | 0.07 |
| LELB_PC6 | GP_Sensors | Sample entropy acceleration during forward walking and 360° turning | 0.06 |
| RANK_PC2 | GP_Sensors | Max gyroscope and angular velocity jerk during forward and backward walking | 0.06 |
| LELB_PC4 | GP_Sensors | RMS and mean acceleration during 360° turning | 0.06 |
| LELB_PC5 | GP_Sensors | Sample entropy gyroscope during forward walking and 360° turning | 0.06 |
| LANK_PC1 | GP_Sensors | RMS and mean acceleration and gyroscope during forward walking and 360° turning | 0.05 |
| Forward walking_PC3 | GP_Motion | Walking speed, stride length, and double support phase | 0.05 |
| PSIS_PC6 | GP_Sensors | RMS, mean, max, and sample entropy gyroscope during forward walking | 0.05 |
| SF-36 (total) | PFL scores | Health-related quality of life (Total) | 0.05 |
| LELB_PC1 | GP_Sensors | RMS, mean, and max gyroscope and angular velocity jerk during forward walking and 360° turning | 0.04 |
| PSIS_PC1 | GP_Sensors | RMS, mean, and max acceleration and gyroscope during 360° turning | 0.04 |
| RANK_PC3 | GP_Sensors | Max and sample entropy acceleration and jerk during forward walking and 360° turning | 0.04 |
| LANK_PC5 | GP_Sensors | Sample entropy gyroscope during forward and backward walking, and 360° turning | 0.04 |
| NQ | PFL scores | Nutrition quotient assessing dietary quality | 0.03 |
| LANK_PC6 | GP_Sensors | Max and sample entropy acceleration and jerk during backward walking | 0.03 |
| LANK_PC2 | GP_Sensors | RMS and mean acceleration and gyroscope during forward and backward walking, and 360° turning | 0.03 |
| SF-36 (physical) | PFL scores | Health-related quality of life (Physical) | 0.03 |
| Turning_PC6 | GP_Motion | Contralateral temporal coordination | 0.03 |
| 5STST | PFL scores | Time to complete five sit-to-stand movements | 0.03 |
| RELB_PC1 | GP_Sensors | RMS, mean, and max acceleration and gyroscope, and angular velocity jerk during 360° turning | 0.02 |
| Turning_PC1 | GP_Motion | Walking speed and stride length | 0.01 |
| Mini-BEST | PFL scores | Balance performance test | 0.01 |
| RANK_PC4 | GP_Sensors | Sample entropy gyroscope during forward and backward walking, and 360° turning | 0.01 |
| LELB_PC8 | GP_Sensors | Sample entropy acceleration and gyroscope during backward walking | 0.01 |
| RANK_PC1 | GP_Sensors | RMS and mean acceleration and gyroscope during forward and backward walking, and 360° turning | 0.01 |
| Turning_PC2 | GP_Motion | Double support phase | 0.01 |

### Table 5. – Top features selected by the mutual Information algorithm for the relationship between single modalities and MDS-UPDRS Total.

| **Feature** | **Domain** | **Description** | **Feature selection score** |
| --- | --- | --- | --- |
| IPAQ | PFL scores | Physical activity level assessment | 0.20 |
| 6MWT | PFL scores | Distance walked in 6 min | 0.19 |
| SF-36 (physical) | PFL scores | Health-related quality of life (Physical) | 0.16 |
| SF-36 (total) | PFL scores | Health-related quality of life (Total) | 0.15 |
| Mini-BEST | PFL scores | Balance performance test | 0.09 |
| 5STST | PFL scores | Time to complete five sit-to-stand movements | 0.09 |
| NQ | PFL scores | Nutrition quotient assessing dietary quality | 0.09 |
| Grip strength_R | PFL scores | Hand grip strength using a dynamometer (Right) | 0.07 |
| SPPB | PFL scores | Balance, gait, and sit-to-stand performance | 0.05 |
| SF-36 (mental) | PFL scores | Health-related quality of life (Mental) | 0.02 |
| Turning_PC6 | GP_Motion | Contralateral temporal coordination | 0.15 |
| Forward walking_PC3 | GP_Motion | Walking speed, stride length, and double support phase | 0.12 |
| Backward walking_PC7 | GP_Motion | Double support phase | 0.09 |
| Turning_PC1 | GP_Motion | Walking speed and stride length | 0.09 |
| Turning_PC5 | GP_Motion | Contralateral temporal coordination | 0.03 |
| RELB_PC1 | GP_Sensors | RMS, mean, and max acceleration and gyroscope, and angular velocity jerk during 360° turning | 0.19 |
| T10_PC2 | GP_Sensors | RMS, mean, and max gyroscope during forward walking and 360° turning | 0.15 |
| PSIS_PC6 | GP_Sensors | RMS, mean, max, and sample entropy gyroscope during forward walking | 0.14 |
| PSIS_PC5 | GP_Sensors | Sample entropy gyroscope during forward walking and 360° turning | 0.11 |
| LELB_PC6 | GP_Sensors | Sample entropy acceleration during forward walking and 360° turning | 0.10 |
| PSIS_PC1 | GP_Sensors | RMS, mean, and max acceleration and gyroscope during 360° turning | 0.06 |
| T10_PC4 | GP_Sensors | RMS, mean, and max acceleration, gyroscope, and angular velocity jerk during backward walking | 0.05 |
| LANK_PC4 | GP_Sensors | Max and sample entropy acceleration and jerk during forward walking and 360° turning | 0.04 |
| LANK_PC2 | GP_Sensors | RMS and mean acceleration and gyroscope during forward and backward walking, and 360° turning | 0.04 |
| LELB_PC3 | GP_Sensors | RMS, mean, and max acceleration, gyroscope, and angular velocity jerk during forward and backward walking | 0.04 |
| RANK_PC3 | GP_Sensors | Max and sample entropy acceleration and jerk during forward walking and 360° turning | 0.03 |
| LELB_PC1 | GP_Sensors | RMS, mean, and max gyroscope and angular velocity jerk during forward walking and 360° turning | 0.03 |
| LELB_PC4 | GP_Sensors | RMS and mean acceleration during 360° turning | 0.02 |
| RELB_PC4 | GP_Sensors | Sample entropy acceleration and gyroscope during forward and backward walking, and 360° turning | 0.02 |
| T10_PC5 | GP_Sensors | Sample entropy gyroscope during forward walking and 360° turning | 0.01 |
| LANK_PC3 | GP_Sensors | Max gyroscope, jerk, and angular velocity jerk during forward and backward walking, and 360° turning | 0.01 |

### Table 6. – Top features selected by the mutual Information algorithm for the relationship between single modalities and MDS-UPDRS Part I.

| **Feature** | **Domain** | **Description** | **Feature selection score** |
| --- | --- | --- | --- |
| Grip strength_R | PFL scores | Hand grip strength using a dynamometer (Right) | 0.17 |
| SF-36 (total) | PFL scores | Health-related quality of life (Total) | 0.12 |
| SF-36 (mental) | PFL scores | Health-related quality of life (Mental) | 0.11 |
| 5STST | PFL scores | Time to complete five sit-to-stand movements | 0.06 |
| SPPB | PFL scores | Balance, gait, and sit-to-stand performance | 0.04 |
| SF-36 (physical) | PFL scores | Health-related quality of life (Physical) | 0.03 |
| Grip strength_L | PFL scores | Hand grip strength using a dynamometer (Left) | 0.01 |
| Turning_PC2 | GP_Motion | Double support phase | 0.06 |
| Forward walking_PC3 | GP_Motion | Walking speed, stride length, and double support phase | 0.05 |
| Backward walking_PC4 | GP_Motion | Walking speed and stride length | 0.03 |
| Turning_PC6 | GP_Motion | Contralateral temporal coordination | 0.01 |
| Turning_PC8 | GP_Motion | Contralateral temporal coordination | 0.00 |
| LELB_PC6 | GP_Sensors | Sample entropy acceleration during forward walking and 360° turning | 0.15 |
| RELB_PC3 | GP_Sensors | Max and sample entropy acceleration and jerk during forward and backward walking, and 360° turning | 0.12 |
| RANK_PC3 | GP_Sensors | Max and sample entropy acceleration and jerk during forward walking and 360° turning | 0.07 |
| PSIS_PC1 | GP_Sensors | RMS, mean, and max acceleration and gyroscope during 360° turning | 0.06 |
| T10_PC6 | GP_Sensors | Sample entropy acceleration during forward and backward walking | 0.06 |
| T10_PC2 | GP_Sensors | RMS, mean, and max gyroscope during forward walking and 360° turning | 0.05 |
| LELB_PC8 | GP_Sensors | Sample entropy acceleration and gyroscope during backward walking | 0.04 |
| T10_PC1 | GP_Sensors | Max and sample entropy acceleration, gyroscope, jerk, and angular velocity jerk during forward walking and 360° turning | 0.04 |
| LELB_PC1 | GP_Sensors | RMS, mean, and max gyroscope and angular velocity jerk during forward walking and 360° turning | 0.03 |
| LELB_PC2 | GP_Sensors | Max acceleration, jerk, and angular velocity jerk during forward walking and 360° turning | 0.03 |
| LELB_PC3 | GP_Sensors | RMS, mean, and max acceleration, gyroscope, and angular velocity jerk during forward and backward walking | 0.03 |
| LANK_PC5 | GP_Sensors | Sample entropy gyroscope during forward and backward walking, and 360° turning | 0.02 |
| PSIS_PC4 | GP_Sensors | RMS, mean, and max acceleration, gyroscope, jerk, and angular velocity jerk during backward walking | 0.01 |
| RANK_PC1 | GP_Sensors | RMS and mean acceleration and gyroscope during forward and backward walking, and 360° turning | 0.01 |

### Table 7. – Top features selected by the mutual Information algorithm for the relationship between single modalities and MDS-UPDRS Part II.

| **Feature** | **Domain** | **Description** | **Feature selection score** |
| --- | --- | --- | --- |
| SF-36 (total) | PFL scores | Health-related quality of life (Total) | 0.18 |
| Grip strength_R | PFL scores | Hand grip strength using a dynamometer (Right) | 0.11 |
| SPPB | PFL scores | Balance, gait, and sit-to-stand performance | 0.10 |
| Grip strength_L | PFL scores | Hand grip strength using a dynamometer (Left) | 0.08 |
| 5STST | PFL scores | Time to complete five sit-to-stand movements | 0.08 |
| SF-36 (physical) | PFL scores | Health-related quality of life (Physical) | 0.07 |
| Mini-BEST | PFL scores | Balance performance test | 0.06 |
| 6MWT | PFL scores | Distance walked in 6 min | 0.03 |
| NQ | PFL scores | Nutrition quotient assessing dietary quality | 0.02 |
| IPAQ | PFL scores | Physical activity level assessment | 0.00 |
| SF-36 (mental) | PFL scores | Health-related quality of life (Mental) | 0.00 |
| Backward walking_PC4 | GP_Motion | Walking speed and stride length | 0.12 |
| Turning_PC1 | GP_Motion | Walking speed and stride length | 0.05 |
| Turning_PC2 | GP_Motion | Double support phase | 0.03 |
| Forward walking_PC3 | GP_Motion | Walking speed, stride length, and double support phase | 0.02 |
| T10_PC2 | GP_Sensors | RMS, mean, and max gyroscope during forward walking and 360° turning | 0.16 |
| RANK_PC1 | GP_Sensors | RMS and mean acceleration and gyroscope during forward and backward walking, and 360° turning | 0.14 |
| LANK_PC1 | GP_Sensors | RMS and mean acceleration and gyroscope during forward walking and 360° turning | 0.13 |
| LELB_PC1 | GP_Sensors | RMS, mean, and max gyroscope and angular velocity jerk during forward walking and 360° turning | 0.12 |
| RELB_PC1 | GP_Sensors | RMS, mean, and max acceleration and gyroscope, and angular velocity jerk during 360° turning | 0.07 |
| LELB_PC6 | GP_Sensors | Sample entropy acceleration during forward walking and 360° turning | 0.07 |
| PSIS_PC2 | GP_Sensors | Max and sample entropy acceleration and jerk during forward walking and 360° turning | 0.06 |
| T10_PC3 | GP_Sensors | RMS and mean acceleration during forward and backward walking, and 360° turning | 0.06 |
| LELB_PC2 | GP_Sensors | Max acceleration, jerk, and angular velocity jerk during forward walking and 360° turning | 0.05 |
| PSIS_PC1 | GP_Sensors | RMS, mean, and max acceleration and gyroscope during 360° turning | 0.05 |
| PSIS_PC5 | GP_Sensors | Sample entropy gyroscope during forward walking and 360° turning | 0.04 |
| LANK_PC6 | GP_Sensors | Max and sample entropy acceleration and jerk during backward walking | 0.03 |
| T10_PC6 | GP_Sensors | Sample entropy acceleration during forward and backward walking | 0.03 |
| RELB_PC4 | GP_Sensors | Sample entropy acceleration and gyroscope during forward and backward walking, and 360° turning | 0.03 |
| PSIS_PC6 | GP_Sensors | RMS, mean, max, and sample entropy gyroscope during forward walking | 0.03 |
| LELB_PC7 | GP_Sensors | Sample entropy acceleration during 360° turning | 0.02 |
| LANK_PC4 | GP_Sensors | Max and sample entropy acceleration and jerk during forward walking and 360° turning | 0.02 |
| LANK_PC3 | GP_Sensors | Max gyroscope, jerk, and angular velocity jerk during forward and backward walking, and 360° turning | 0.02 |
| T10_PC5 | GP_Sensors | Sample entropy gyroscope during forward walking and 360° turning | 0.00 |
| LELB_PC3 | GP_Sensors | RMS, mean, and max acceleration, gyroscope, and angular velocity jerk during forward and backward walking | 0.00 |
| T10_PC4 | GP_Sensors | RMS, mean, and max acceleration, gyroscope, and angular velocity jerk during backward walking | 0.00 |
| PSIS_PC4 | GP_Sensors | RMS, mean, and max acceleration, gyroscope, jerk, and angular velocity jerk during backward walking | 0.00 |

### Table 8. – Top features selected by the mutual Information algorithm for the relationship between single modalities and MDS-UPDRS Part III.

| **Feature** | **Domain** | **Description** | **Feature selection score** |
| --- | --- | --- | --- |
| SPPB | Physical function | Balance, gait, and sit-to-stand performance | 0.19 |
| Grip strength_R | Physical function | Hand grip strength using a dynamometer (Right) | 0.15 |
| 6MWT | Physical function | Distance walked in 6 min | 0.13 |
| SF-36 (mental) | Lifestyle | Health-related quality of life (Mental) | 0.11 |
| Grip strength_L | Physical function | Hand grip strength using a dynamometer (Left) | 0.10 |
| SF-36 (total) | Lifestyle | Health-related quality of life (Total) | 0.05 |
| 5STST | Physical function | Time to complete five sit-to-stand movements | 0.03 |
| NQ | Lifestyle | Nutrition quotient assessing dietary quality | 0.03 |
| SF-36 (physical) | Lifestyle | Hand grip strength using a dynamometer (Physical) | 0.02 |
| Backward walking_PC7 | GP_Motion | Double support phase | 0.12 |
| Forward walking_PC3 | GP_Motion | Walking speed, stride length, and double support phase | 0.04 |
| Turning_PC6 | GP_Motion | Contralateral temporal coordination | 0.03 |
| Turning_PC2 | GP_Motion | Double support phase | 0.01 |
| Turning_PC1 | GP_Motion | Walking speed and stride length | 0.00 |
| RANK_PC5 | GP_Sensors | Max acceleration and jerk during backward walking | 0.10 |
| PSIS_PC5 | GP_Sensors | Sample entropy gyroscope during forward walking and 360° turning | 0.08 |
| T10_PC1 | GP_Sensors | Max and sample entropy acceleration, gyroscope, jerk, and angular velocity jerk during forward walking and 360° turning | 0.08 |
| LELB_PC6 | GP_Sensors | Sample entropy acceleration during forward walking and 360° turning | 0.08 |
| T10_PC5 | GP_Sensors | Sample entropy gyroscope during forward walking and 360° turning | 0.08 |
| T10_PC2 | GP_Sensors | RMS, mean, and max gyroscope during forward walking and 360° turning | 0.06 |
| LELB_PC5 | GP_Sensors | Sample entropy gyroscope during forward walking and 360° turning | 0.06 |
| PSIS_PC6 | GP_Sensors | RMS, mean, max, and sample entropy gyroscope during forward walking | 0.05 |
| LANK_PC1 | GP_Sensors | RMS and mean acceleration and gyroscope during forward walking and 360° turning | 0.05 |
| RANK_PC2 | GP_Sensors | Max gyroscope and angular velocity jerk during forward and backward walking, and 360° turning | 0.05 |
| LELB_PC1 | GP_Sensors | RMS, mean, and max gyroscope and angular velocity jerk during forward walking and 360° turning | 0.05 |
| LELB_PC4 | GP_Sensors | RMS and mean acceleration during 360° turning | 0.05 |
| RANK_PC3 | GP_Sensors | Max and sample entropy acceleration and jerk during forward walking and 360° turning | 0.04 |
| RELB_PC1 | GP_Sensors | RMS, mean, and max acceleration and gyroscope, and angular velocity jerk during 360° turning | 0.03 |
| LANK_PC6 | GP_Sensors | Max and sample entropy acceleration and jerk during backward walking | 0.03 |
| LANK_PC5 | GP_Sensors | Sample entropy gyroscope during forward and backward walking, and 360° turning | 0.03 |
| PSIS_PC1 | GP_Sensors | RMS, mean, and max acceleration and gyroscope during 360° turning | 0.02 |
| LANK_PC2 | GP_Sensors | RMS and mean acceleration and gyroscope during forward and backward walking, and 360° turning | 0.01 |
| LELB_PC8 | GP_Sensors | Sample entropy acceleration and gyroscope during backward walking | 0.01 |
| PSIS_PC2 | GP_Sensors | Max and sample entropy acceleration and jerk during forward walking and 360° turning | 0.00 |
