# Supplementary material for: Using machine learning to identify Parkinson’s disease severity subtypes with multimodal data
Source: Research Square preprint supplement (doi:10.21203/rs.3.rs-5523724/v1), 2025-04-21
Supplement: Supplementary file 3 [file fe48752242bf718a888f3b23.docx]

## **Hyperparameter tuning**

To optimize the performance of random forest regressor and LASSO models, we performed hyperparameter tuning using the Grid Search method. The Grid Search method involves defining a grid of hyperparameter values for each algorithm and evaluating the model’s performance for every possible combination within that grid. The evaluation metric used for model selection was a mean absolute error (MAE) and R2, with cross-validation performed to ensure robustness in the results.

- LASSO Regression: The regularization parameter 𝛼 was tuned to achieve optimal performance.
- Random Forest Regressor: The number of estimators, maximum tree depth, and minimum samples per split were optimized.

For more details, refer to the official Scikit-learn documentation (Note: Links may not be clickable in the PDF format but can be copied and accessed in a web browser).

| Table S7. Hyperparameter tuning. | | | |
| --- | --- | --- | --- |
| Algorithms | Hyper-parameters | Metrics | Link |
| Lasso | {'lasso__alpha': [0.01, 0.1, 1, 10]} | Mean absolute error  R2 | <https://scikit-learn.org/0.15/modules/generated/sklearn.linear_model.Lasso.html> |
| RandomForestRegressor | {'randomforestregressor__n_estimators': [250, 300, 350, 400, 500],  'randomforestregressor__max_features': [0.22, 0.33, 0.44, 0.55],  'randomforestregressor__random_state': [42]} | Mean absolute error  R2 | <https://scikit-learn.org/0.16/modules/generated/sklearn.ensemble.RandomForestRegressor.html> |
